# Supplementary material
Source: ML conference proceedings conference paper supplement (https://openreview.net/forum?id=3s6aE1LeiR)
Supplement: supplementary_material [file attachment]

## 1 A The detailed description of Proposition 1

2 In the Proposition 1 in the main body, we talk about the condition that the intervention gets the perfect  
 3 mean compared to the real mean. Given Equation 3 in the main body, we have  $\mu_{true} = \mu_{obser} - \mu_Z$ .  
 4 Assuming  $p^*$  is the optimal probability for flipping and interventional data and observational data,  
 5 then we have:

$$p^* \mu_{ven} + (1 - p^*) \mu_{obser} = \mu_{true} \quad (1)$$

$$p^* \mu_{ven} + (1 - p^*) \mu_{obser} = \mu_{obser} - \mu_Z \quad (2)$$

$$p^* (\mu_{ven} - \mu_{obser}) = -\mu_Z \quad (3)$$

$$p^* = -\frac{\mu_Z}{\mu_{ven} - \mu_{obser}} \quad (4)$$

$$p^* = \frac{\mu_Z}{\mu_{obser} - \mu_{ven}} \quad (5)$$

6 The obvious condition that satisfies this Equation 5 is that  $\mu_{ven}$  is getting closer and closer to the real  
 7 mean  $\mu_{true}$  as well as  $p$  is closer to 1. The reason is obvious. Assuming the interventional data is  
 8 perfect:  $\mu_{ven} = \mu_{obser} - \mu_Z$ . Then we have  $p^* = 1$  according to Equation 5.
